# Supplementary material for: Influence of the coagulation bath on the nanostructure of cellulose films regenerated from an ionic liquid solution
Source: Royal Society of Chemistry journal article supplement (doi:10.1039/d4ra00971a), 2024-01-01
Supplement: d4ra00971a1.pdf [file d4ra00971a1.pdf]

# Supplementary Information: Influence of the coagulation bath on the nanostructure of cellulose films regenerated from an ionic liquid solution

---

<sup>a</sup> Faculty of Applied Sciences, Delft University of Technology, 2629 JB, Delft, Netherlands.

<sup>b</sup> LEPABE - Laboratory for Process Engineering, Environment, Biotechnology and Energy, Faculty of Engineering, University of Porto, Rua Dr. Roberto Frias, 4200-465 Porto, Portugal.

<sup>c</sup> ALiCE - Associate Laboratory in Chemical Engineering, Faculty of Engineering, University of Porto, Rua Dr. Roberto Frias, 4200-465 Porto, Portugal.

<sup>d</sup> ISIS pulsed Neutron and Muon Source, Rutherford Appleton Laboratory, Chilton, Oxfordshire, OX11 0QX, United Kingdom

† Corresponding e-mails: gbernardo@fe.up.pt; S.R.Parnell@tudelft.nl

Electronic Supplementary Information (ESI) available: [details of any supplementary information available should be included here]. See DOI: 10.1039/x0xx00000x

Lassi V. Tiihonen,<sup>a</sup> Gabriel Bernardo<sup>\*b,c</sup>, Robert Dalgliesh<sup>d</sup>, Adélio Mendes<sup>b,c</sup>, and Steven R. Parnell<sup>\*a</sup>

## S1 – FULL DATA AND FIT PLOTS

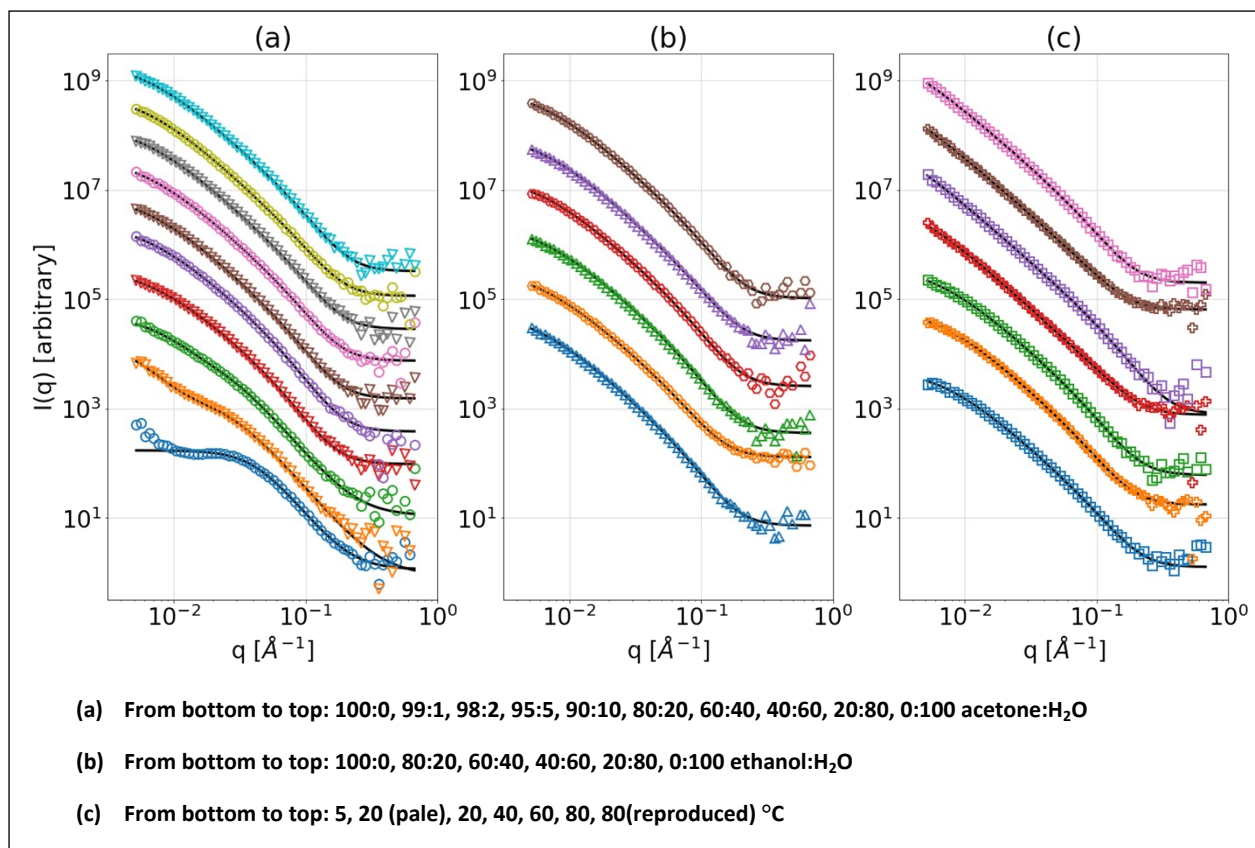

S2 – IMAGES

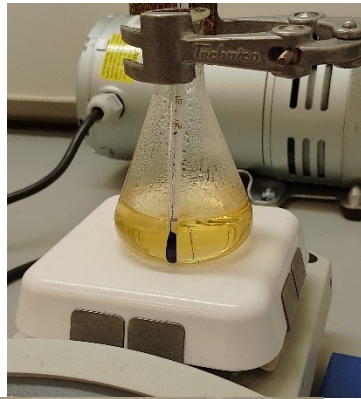

Pale solution

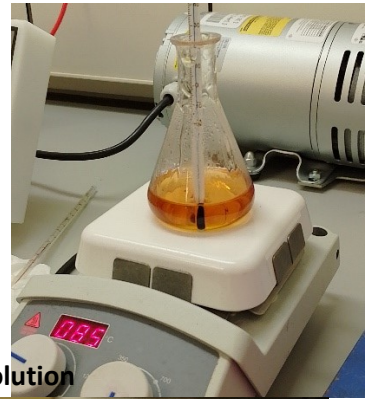

Fully browned solution

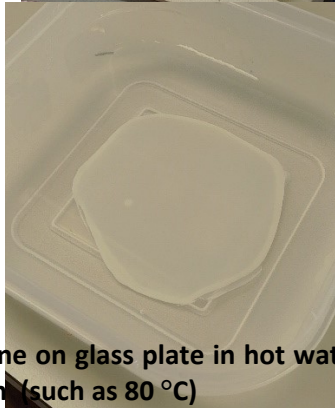

Cloudy membrane on glass plate in hot water coagulation bath (such as 80 °C)

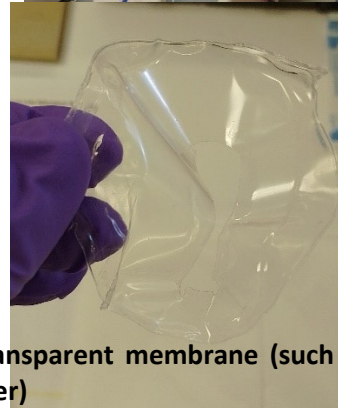

Dried highly transparent membrane (such as from 100% water)

### S3 – PALE-BROWNEED SOLUTION COMPARISON

A “pale” cellulose solution was used to prepare a water-coagulated sample before the fully browned solution. Adjusting for calliper-measured sample thickness resulted in identical SANS data within uncertainties.

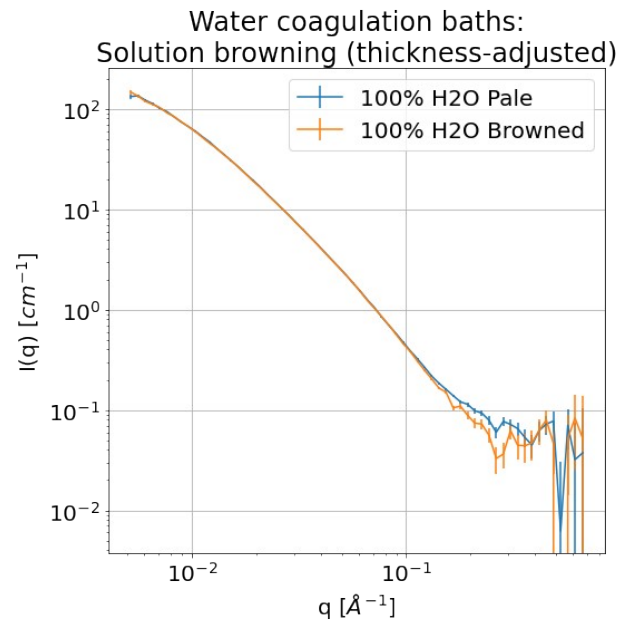

## S4 – METHANOL-ETHANOL COMPARISON

Pure methanol and ethanol resulted in highly similar SANS results. Subtraction of the estimated excess high-q background from the methanol signal shows the data are nearly identical.

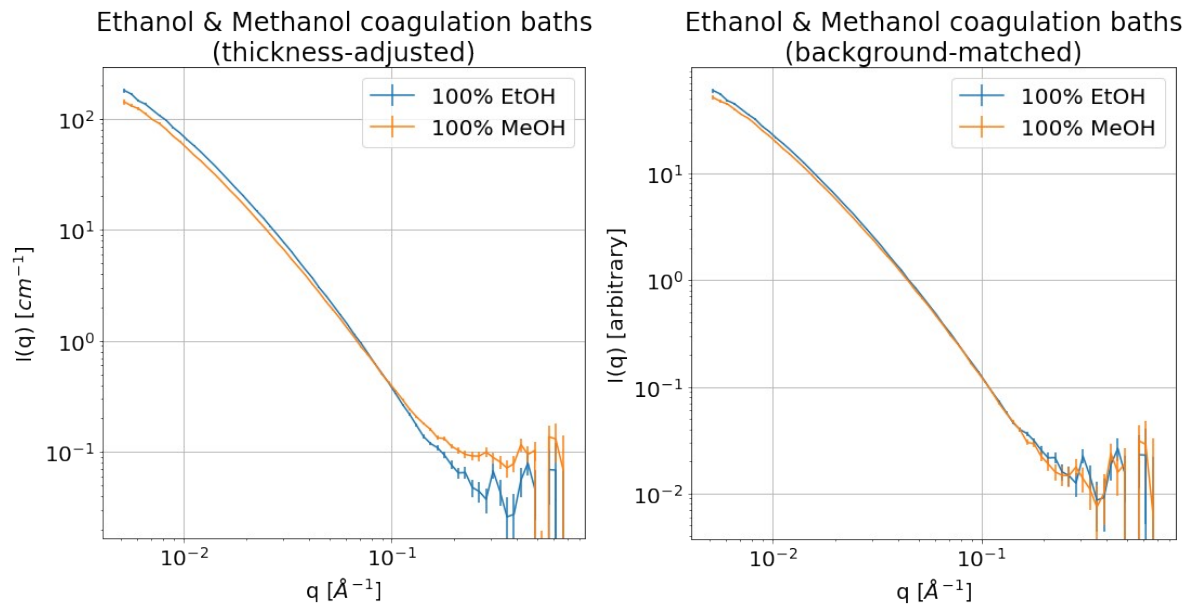

## S5 – REPRODUCTION: HIGH-TEMPERATURE WATER

Reproduction of a high-temperature water sample shows the high reproducibility of SANS results for water coagulation baths.

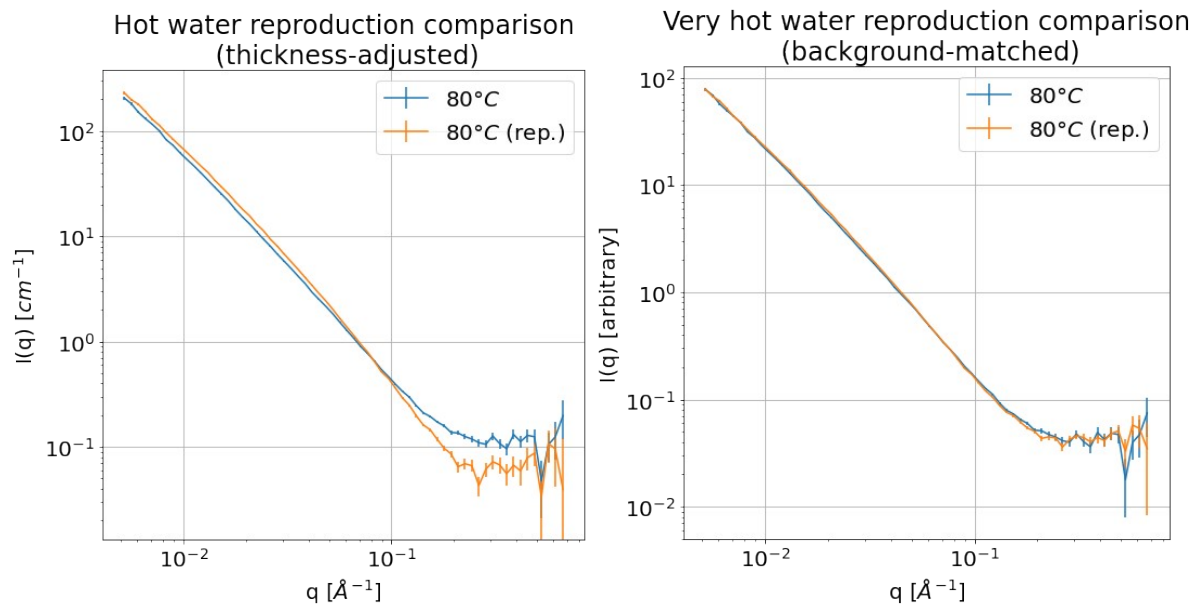

## S6 – MICROBALANCE RESULTS: ACETONE-WATER

Mass fractions as measured by microbalance method for acetone-water samples. The standard deviations were corrected based on the control chart constant  $c_4$  for unbiased uncertainty estimates.

\*: for the single-sample cases, the highest adjacent standard deviation was assumed.

| vol%<br>H2O | $mean(\phi_{m,cel})$ | $N_{samples}$ | $STD(\phi_{m,cel})$ | $c_4(N)$ | $STD_{corr}(\phi)$ |
|-------------|----------------------|---------------|---------------------|----------|--------------------|
| 0           | 18.56                | 9             | 1.56                | 0.97     | 1.61               |
| 1           | 22.07                | 2             | 0.81                | 0.80     | 1.02               |
| 2           | 20.49                | 3             | 0.46                | 0.89     | 0.52               |
| 5           | 18.04                | 4             | 1.36                | 0.92     | 1.48               |
| 10          | 13.37                | 3             | 0.68                | 0.89     | 0.76               |
| 20          | 13.01                | 3             | 0.20                | 0.89     | 0.23               |
| 30          | 12.46                | 1             | 0.28*               | -        | 0.31*              |
| 40          | 12.25                | 1             | 0.28*               | -        | 0.31*              |
| 50          | 12.32                | 3             | 0.28                | 0.89     | 0.31               |
| 100         | 12.02                | 2             | 0.12                | 0.80     | 0.15               |

## S7 – MICROBALANCE RESULTS: WATER TEMPERATURE

Mass fractions as measured by microbalance method for water temperature samples. The standard deviations were corrected based on the control chart constant  $c_4$  for unbiased uncertainty estimates.

\*: for the single-sample cases, the highest adjacent standard deviation was assumed.

| H2O<br>temp | $mean(\phi_{m,cel})$ | $N_{samples}$ | $STD(\phi_{m,cel})$ | $c_4(N)$ | $STD_{corr}(\phi)$ |
|-------------|----------------------|---------------|---------------------|----------|--------------------|
| 5           | 11.4                 | 1             | 0.17*               | -        | 0.21*              |
| 20          | 11.3                 | 2             | 0.17                | 0.80     | 0.21               |
| 40          | 9.97                 | 4             | 0.34                | 0.92     | 0.37               |
| 60          | 8.62                 | 3             | 0.33                | 0.89     | 0.37               |
| 80          | 8.55                 | 3             | 0.19                | 0.89     | 0.21               |

## S8 – SASVIEW FITTING SAMPLE LEGEND & THICKNESSES:

| Label | Description                                               | Thickness [mm] |
|-------|-----------------------------------------------------------|----------------|
| Wet01 | Pale solution - Room temp water (lab room temp 19.7 C)    | 0.403          |
| Wet02 | Browned solution - Room temp water (lab room temp 19.7 C) | 0.310          |
| Wet03 | " Ice water (~5 C)                                        | 0.267          |
| Wet04 | " Hot water (~60 C)                                       | 0.350          |
| Wet05 | " Very hot water (~80 C)                                  | 0.377          |
| Wet06 | " Warm water (~40 C)                                      | 0.340          |
| Wet07 | " Very hot water (~80 C) (reproduced with shorter delay)  | 0.337          |
| Wet08 | 100% acetone                                              | 0.184          |
| Wet09 | 80:20% acetone:H2O                                        | 0.283          |
| Wet10 | 60:40% acetone:H2O                                        | 0.317          |
| Wet11 | 40:60% acetone:H2O                                        | 0.283          |
| Wet12 | 20:80% acetone:H2O                                        | 0.277          |

|       |                       |       |
|-------|-----------------------|-------|
| Wet13 | 100% H2O              | 0.283 |
| Wet14 | 90:10% acetone:H2O    | 0.330 |
| Wet15 | 95:5% acetone:H2O     | 0.227 |
| Wet16 | 98:2% acetone:H2O     | 0.187 |
| Wet17 | 100% ethanol          | 0.333 |
| Wet18 | 100% methanol         | 0.363 |
| Wet19 | 80:20% ethanol:H2O    | 0.333 |
| Wet20 | 60:40% ethanol:H2O    | 0.313 |
| Wet21 | 40:60% ethanol:H2O    | 0.300 |
| Wet22 | 20:80% ethanol:H2O    | 0.283 |
| Wet23 | 99:1% acetone:H2O     | 0.117 |
| Wet24 | 99.5:0.5% acetone:H2O | 0.117 |

## S9 – SASVIEW FITTING OUTPUTS: ACETONE-WATER

PMF fitting outputs (gray = fixed values):

|       | scale    | scale_err | background | background_err | xi1    | xi1_err | xi2      | xi2_err  | d1 | d2     | d2_err   | slid_polym | slid_nonsolvent |
|-------|----------|-----------|------------|----------------|--------|---------|----------|----------|----|--------|----------|------------|-----------------|
| Wet02 | 0.040147 | 0.001394  | 0.012366   | 0.00082        | 8.8269 | 0.24773 | 170.8    | 4.0327   | 2  | 2.0722 | 0.010147 | 1.75       | 6.4             |
| Wet08 | 0.048441 | 8.66      | 0.018946   | 0.001873       | -16.23 | 1485.7  | 16.224   | 1091.4   | 2  | 2.3578 | 5.8942   | 1.75       | 6.4             |
| Wet09 | 0.040347 | 0.001795  | 0.014846   | 0.000719       | 10.956 | 0.29993 | 170.32   | 4.5817   | 2  | 2.0657 | 0.012695 | 1.75       | 6.4             |
| Wet10 | 0.04496  | 0.001665  | 0.018231   | 0.000773       | 10.005 | 0.25376 | 176.3    | 4.356    | 2  | 2.0645 | 0.010688 | 1.75       | 6.4             |
| Wet11 | 0.041577 | 0.001508  | 0.017327   | 0.00078        | 9.6572 | 0.25366 | 174.87   | 4.2367   | 2  | 2.0758 | 0.010485 | 1.75       | 6.4             |
| Wet12 | 0.035553 | 0.00131   | 0.017487   | 0.000987       | 8.5683 | 0.2829  | 175.38   | 4.4343   | 2  | 2.0962 | 0.010689 | 1.75       | 6.4             |
| Wet14 | 0.060817 | 0.002934  | 0.01477    | 0.000826       | 12.337 | 0.31262 | 171.49   | 4.7554   | 2  | 2.0249 | 0.013643 | 1.75       | 6.4             |
| Wet15 | 0.059418 | 0.004135  | 0.014954   | 0.000647       | 14.01  | 0.42469 | 169.27   | 6.3575   | 2  | 1.9431 | 0.019604 | 1.75       | 6.4             |
| Wet16 | 0.26403  | 0.044644  | 0.01253    | 0.000618       | 20.896 | 0.98862 | 544.5    | 178.01   | 2  | 1.4434 | 0.048539 | 1.75       | 6.4             |
| Wet23 | 0.71495  | 0.076519  | 0.001058   | 0.000876       | 23.293 | 0.84381 | 2.08E+08 | 1.00E+08 | 2  | 1.05   | 0.027291 | 1.75       | 6.4             |

DL fitting outputs (gray = fixed values):

|       | scale | background | background_err | A_scale  | A_scale_err | A_cor_length | A_cor_length_err | B_lorentz_scale_1 | B_lorentz_scale_1_err | B_lorentz_length_1 | B_lorentz_length_1_err | B_lorentz_exp_1 | B_lorentz_exp_1_err |
|-------|-------|------------|----------------|----------|-------------|--------------|------------------|-------------------|-----------------------|--------------------|------------------------|-----------------|---------------------|
| Wet02 | 1     | 0.003598   | 0.001006       | 6.77E-05 | 1.80E-06    | 93.839       | 1.3212           | 3.7711            | 0.19925               | 36.635             | 0.9566                 | 2.6224          | 0.021607            |
| Wet08 | 1     | 0.011362   | 0.00085        | 0        | 0           | 0            | 0                | 1.6933            | 0.01004               | 24.279             | 0.11087                | 3.0266          | 0.018871            |
| Wet09 | 1     | 0.006024   | 0.000911       | 5.99E-05 | 1.85E-06    | 98.588       | 1.6218           | 4.2451            | 0.23575               | 39.421             | 1.0038                 | 2.7085          | 0.020326            |
| Wet10 | 1     | 0.008508   | 0.000968       | 6.94E-05 | 1.85E-06    | 97.866       | 1.4143           | 4.5036            | 0.22621               | 38.304             | 0.91428                | 2.6703          | 0.019334            |
| Wet11 | 1     | 0.007414   | 0.000964       | 6.51E-05 | 1.88E-06    | 9.96E+01     | 1.5413           | 4.6404            | 0.24819               | 39.65              | 1.0084                 | 2.6376          | 0.019064            |
| Wet12 | 1     | 0.006778   | 0.001167       | 5.67E-05 | 2.16E-06    | 103.88       | 2.054            | 5.0557            | 0.35613               | 43.306             | 1.4804                 | 2.5353          | 0.021177            |
| Wet14 | 1     | 0.005642   | 0.001072       | 8.31E-05 | 2.06E-06    | 93           | 1.23             | 4.562             | 0.2097                | 36.007             | 0.75165                | 2.8194          | 0.021037            |
| Wet15 | 1     | 0.007865   | 0.000877       | 5.53E-05 | 1.86E-06    | 90.631       | 1.5432           | 3.4869            | 0.18565               | 36.424             | 0.8566                 | 2.8325          | 0.022904            |
| Wet16 | 1     | 0.006896   | 0.00087        | 2.88E-05 | 1.30E-06    | 100.79       | 2.5148           | 3.5273            | 0.16427               | 37.968             | 0.83739                | 2.7698          | 0.022017            |
| Wet23 | 1     | 0.002269   | 0.00124        | 9.15E-06 | 4.55E-07    | 174.57       | 11.959           | 3.1749            | 0.11528               | 37.291             | 0.80422                | 2.7387          | 0.031133            |

## S10 – SASVIEW FITTING OUTPUTS: ETHANOL-WATER

PMF fitting outputs (gray = fixed values):

|       | scale    | scale_err | background | background_err | xi1    | xi1_err | xi2    | xi2_err | d1 | d2     | d2_err   | slid_polym | slid_nonsolvent |
|-------|----------|-----------|------------|----------------|--------|---------|--------|---------|----|--------|----------|------------|-----------------|
| Wet13 | 0.041577 | 0.001508  | 0.017327   | 0.00078        | 9.6572 | 0.25366 | 174.87 | 4.2367  | 2  | 2.0758 | 0.010485 | 1.75       | 6.4             |
| Wet17 | 0.042117 | 0.001522  | 0.014374   | 0.000732       | 10.549 | 0.25385 | 188.36 | 4.7451  | 2  | 2.0923 | 0.010308 | 1.75       | 6.4             |
| Wet19 | 0.054    | 0.00228   | 0.036835   | 0.000753       | 11.388 | 0.27628 | 182.4  | 5.0578  | 2  | 2.027  | 0.01207  | 1.75       | 6.4             |
| Wet20 | 0.051413 | 0.00201   | 0.014505   | 0.000737       | 10.884 | 0.25861 | 179.68 | 4.6359  | 2  | 2.0431 | 0.011219 | 1.75       | 6.4             |
| Wet21 | 0.047649 | 0.001665  | 0.014888   | 0.000768       | 10.002 | 0.23925 | 178.26 | 4.2204  | 2  | 2.0656 | 0.010089 | 1.75       | 6.4             |
| Wet22 | 0.032548 | 0.001115  | 0.014568   | 0.000823       | 8.5376 | 0.2596  | 169.87 | 3.8966  | 2  | 2.118  | 0.00995  | 1.75       | 6.4             |

DL fitting outputs:

|        | background | background_err | A_scale  | A_scale_err | A_cor_length | A_cor_length_err | B_lorentz_scale_1 | B_lorentz_scale_1_err | B_lorentz_length_1 | B_lorentz_length_1_err | B_lorentz_exp_1 | B_lorentz_exp_1_err |
|--------|------------|----------------|----------|-------------|--------------|------------------|-------------------|-----------------------|--------------------|------------------------|-----------------|---------------------|
| Wet 02 | 0.003579   | 0.001006       | 6.77E-05 | 1.80E-06    | 93.839       | 1.3212           | 3.7711            | 0.19925               | 36.635             | 0.9566                 | 2.6224          | 0.021607            |
| Wet 17 | 0.0028949  | 0.000902       | 6.25E-05 | 1.92E-06    | 111.41       | 1.9468           | 6.3686            | 0.34132               | 44.622             | 1.085                  | 2.6518          | 0.015686            |
| Wet 19 | 0.02709    | 0.000971       | 7.19E-05 | 1.85E-06    | 97.252       | 1.3681           | 4.5934            | 0.21478               | 37.593             | 0.81823                | 2.7364          | 0.019293            |
| Wet 20 | 0.005283   | 0.000943       | 7.56E-05 | 1.80E-06    | 95.811       | 1.2533           | 4.3705            | 0.19726               | 36.666             | 0.77665                | 2.738           | 0.019301            |
| Wet 21 | 0.0048075  | 0.00096        | 7.44E-05 | 1.84E-06    | 9.83E+01     | 1.3291           | 4.749             | 0.22255               | 38.108             | 0.84912                | 2.6777          | 0.018315            |
| Wet 22 | 0.0036039  | 0.000952       | 4.97E-05 | 2.19E-06    | 110.82       | 2.537            | 6.1786            | 0.44873               | 47.907             | 1.6163                 | 2.5232          | 0.016708            |

## S11 – SASVIEW FITTING OUTPUTS: WATER TEMPERATURE

PMF fitting outputs (gray = fixed values):

|       | scale    | scale_err  | background | background_err | xi1    | xi1_err | xi2    | xi2_err | d1 | d2     | d2_err   | slid_polymer | slid_nonsolvent |
|-------|----------|------------|------------|----------------|--------|---------|--------|---------|----|--------|----------|--------------|-----------------|
| Wet01 | 0.051643 | 0.001582   | 0.024979   | 0.000843       | 9.0888 | 0.21313 | 168.52 | 3.4381  | 2  | 2.078  | 0.008943 | 1.75         | 6.4             |
| Wet02 | 0.040147 | 0.0013938  | 0.012366   | 0.00082        | 8.8269 | 0.24773 | 170.8  | 4.0327  | 2  | 2.0722 | 0.010147 | 1.75         | 6.4             |
| Wet03 | 0.032985 | 0.0012266  | 0.012528   | 0.000889       | 7.7342 | 0.27767 | 153.09 | 3.5775  | 2  | 2.0719 | 0.011019 | 1.75         | 6.4             |
| Wet04 | 0.034335 | 0.00071407 | 0.003347   | 0.001018       | 5.9689 | 0.21176 | 437.09 | 28.3    | 2  | 2.0748 | 0.006195 | 1.75         | 6.4             |
| Wet05 | 0.038188 | 0.00095696 | 0.038378   | 0.000931       | 7.6277 | 0.21572 | 425.88 | 28.823  | 2  | 2.056  | 0.007365 | 1.75         | 6.4             |
| Wet06 | 0.029757 | 0.00065676 | 0.022349   | 0.0011         | 5.5827 | 0.23885 | 268.48 | 8.5408  | 2  | 2.1191 | 0.006562 | 1.75         | 6.4             |
| Wet07 | 0.043974 | 0.0012562  | 0.016988   | 0.000795       | 9.3094 | 0.21649 | 382.85 | 22.809  | 2  | 2.0362 | 0.008306 | 1.75         | 6.4             |

DL fitting outputs:

|        | Chi2   | background | background_err | A_scale  | A_scale_err | A_cor_length | A_cor_length_err | B_lorentz_scale_1 | B_lorentz_scale_1_err | B_lorentz_length_1 | B_lorentz_length_1_err | B_lorentz_exp_1 | B_lorentz_exp_1_err |
|--------|--------|------------|----------------|----------|-------------|--------------|------------------|-------------------|-----------------------|--------------------|------------------------|-----------------|---------------------|
| Wet 01 | 2.5274 | 0.01504    | 0.001044       | 9.37E-05 | 1.93E-06    | 91.341       | 1.0169           | 4.3947            | 0.18754               | 34.727             | 0.72599                | 2.6812          | 0.019192            |
| Wet 02 | 2.6275 | 0.0035979  | 0.001006       | 6.77E-05 | 1.80E-06    | 93.839       | 1.3212           | 3.7711            | 0.19925               | 36.635             | 0.9566                 | 2.6224          | 0.021607            |
| Wet 03 | 2.1737 | 0.0061326  | 0.001065       | 6.11E-05 | 1.71E-06    | 84.776       | 1.1919           | 2.4986            | 0.14745               | 32.974             | 1.0064                 | 2.6009          | 0.028561            |
| Wet 04 | 3.5694 | 0.0082309  | 0.001051       | 5.05E-05 | 1.36E-06    | 139.01       | 2.6754           | 6.7488            | 0.43935               | 52.412             | 1.8467                 | 2.317           | 0.016208            |
| Wet 05 | 3.6776 | 0.025104   | 0.001041       | 4.73E-05 | 1.39E-06    | 1.47E+02     | 3.2459           | 7.9435            | 0.49822               | 54.574             | 1.7688                 | 2.3872          | 0.015138            |
| Wet 06 | 3.1287 | 0.0071824  | 0.000864       | 1.31E-05 | 1.14E-06    | 409.85       | 192.07           | 54.796            | 12.573                | 141.62             | 14.873                 | 2.2326          | 0.0066              |
| Wet 07 | 4.4302 | 0.0034785  | 0.000945       | 4.94E-05 | 1.34E-06    | 144.05       | 2.9642           | 7.9746            | 0.42262               | 51.989             | 1.3716                 | 2.4862          | 0.014182            |
